# Supplementary material for: The Health Behaviour of German Outpatient Caregivers in Relation to the COVID-19 Pandemic: A Mixed-Methods Study
Source: MDPI journal article supplement (doi:10.3390/ijerph18158213), 2021-08-03
Supplement: s1 [file s1]

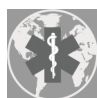

## Supplementary Material

**Table S1.** Interview topic list.

| Phase of the interview                 | Contents                                                                  |
|----------------------------------------|---------------------------------------------------------------------------|
| 1 Information phase                    | Introduction: study information, confidentiality, informed consent        |
| 2 Warm-up phase                        | Qualifications, working activity                                          |
| 3 Main phase                           | Health behaviour, health-promoting behaviour during the COVID-19 pandemic |
| 4 Final phase and end of the interview | Socio-demographics of the interviewees and fare-well                      |

**Table S2.** Variables of the study instrument used in the analyses.

| Variables.                | Name and source of the original scales and items                         | Items (n) |
|---------------------------|--------------------------------------------------------------------------|-----------|
| Socio-demographic factors |                                                                          | 20        |
| Health behaviour          |                                                                          |           |
| Eating behaviour          | Mediterranean Dietary Assessment Score (MEDAS): validated German version | 14        |
| Physical Activity         | Global Physical Activity Questionnaire (GPAQ): validated German version  | 16        |
| Smoking                   | Smoking exposition questionnaire                                         | 7         |
| Sleep quality             | Pittsburgh-Sleep-Quality-Index (PSQI): single-item                       | 1         |

**Table S3.** Self-administered variables of the study instrument used in the analyses.

| Variables                              | Self-developed questions                                                                                                                                                                                                                                                                                                                                                                                                                                                                                                                                                                                                                                                                                                                                                                                                                                                                                                                                                                                                                                                                                                                                                                | Items (n) |
|----------------------------------------|-----------------------------------------------------------------------------------------------------------------------------------------------------------------------------------------------------------------------------------------------------------------------------------------------------------------------------------------------------------------------------------------------------------------------------------------------------------------------------------------------------------------------------------------------------------------------------------------------------------------------------------------------------------------------------------------------------------------------------------------------------------------------------------------------------------------------------------------------------------------------------------------------------------------------------------------------------------------------------------------------------------------------------------------------------------------------------------------------------------------------------------------------------------------------------------------|-----------|
| Health behaviour                       |                                                                                                                                                                                                                                                                                                                                                                                                                                                                                                                                                                                                                                                                                                                                                                                                                                                                                                                                                                                                                                                                                                                                                                                         |           |
| Drinking behaviour                     | <ul style="list-style-type: none"> <li>How much do you drink in total per day?</li> <li>Do you drink beverages containing caffeine, such as coffee or coffee specialties, coke or energy drinks? - Yes / No</li> <li>If yes, how many cups (200ml) of coffee or coffee specialties and glasses of coke or energy drinks do you drink a day?</li> <li>Does your work influence a decreased drinking behaviour? - Yes / No</li> <li>If yes, what are the causes of your reduced drinking behaviour during working hours? - I do not have the time / there are no toilets available / I don't want to go to the toilet with the carers / I forget to drink / I forget to bring something to drink with me / other reasons</li> <li>How would you rate your eating behaviour since the beginning of the COVID-19 pandemic? - I currently eat much unhealthier [-2] / unhealthier [-1] / just as healthy [0] / healthier [1] / much healthier [2] than before.</li> <li>How would you rate your physical activity since the beginning of the COVID-19 pandemic? I am currently much less [-2] / less [-1] / just as [0] / more [1] / much more [2] physically active than before.</li> </ul> | 5         |
| Health behaviour change since pandemic | <ul style="list-style-type: none"> <li>How would you rate your smoking habits since the beginning of the COVID-19 pandemic? - I currently smoke a lot less [-2] / less [-1] / as much as [0] / more [1] / a lot more [2] than before.</li> <li>Since the beginning of the COVID-19 pandemic, my life has become more stressful than before! - I do not agree at all [-2] / I do not agree. [-1] / I neither agree nor disagree. [0] / I agree. [1] / I totally agree. [2]</li> <li>How would you rate your sleep behaviour since the beginning of the COVID-19 pandemic? - I currently sleep much worse [-2] / worse [-1] / neither worse nor better [0] / better [1] / much better [2] than before.</li> </ul>                                                                                                                                                                                                                                                                                                                                                                                                                                                                         | 5         |

**Table S4.** Sub-group analysis of health behaviours and self-perceived health behaviour change since COVID-19 pandemic for gender, age and BMI groups.

| Outcome                                              | M (SD)                                | M (SD)                                   | <i>z</i> <sup>a</sup> | <i>p</i>         | M (SD)                        | M (SD)                        | <i>z</i> <sup>a</sup> | <i>p</i>         | M (SD)                                          | M (SD)                                      | <i>z</i> <sup>a</sup> | <i>p</i>     |
|------------------------------------------------------|---------------------------------------|------------------------------------------|-----------------------|------------------|-------------------------------|-------------------------------|-----------------------|------------------|-------------------------------------------------|---------------------------------------------|-----------------------|--------------|
|                                                      | Male<br>( <i>n</i> = 57) <sup>b</sup> | Female<br>( <i>n</i> = 112) <sup>b</sup> |                       |                  | <40 years<br>( <i>n</i> = 73) | ≥40 years<br>( <i>n</i> = 98) |                       |                  | Normal weight <sup>c</sup><br>( <i>n</i> = 101) | Overweight <sup>c</sup><br>( <i>n</i> = 70) |                       |              |
| Dietary Quality Score <sup>d</sup>                   | 5.4 (±2.04)                           | 6.7 (±2.22)                              | <b>4342</b>           | <b>&lt;0.001</b> | 6.1 (±2.29)                   | 6.4 (±2.18)                   | 3875                  | 0.348            | 6.6 (±2.03)                                     | 5.9 (±2.43)                                 | <b>2795</b>           | <b>0.019</b> |
| Physical Activity <sup>d,e</sup>                     | 8919.2 (±7875.45)                     | 10268.9 (±7871.47)                       | 3116.5                | 0.219            | 9432.5 (±7480.50)             | 10070.1 (±8111.87)            | 3297                  | 0.674            | 9978.6 (±8232.92)                               | 9521.4 (±7231.08)                           | 3066.5                | 0.897        |
| Tobacco consumption <sup>d,f</sup>                   | 19.4 (±22.15)                         | 18.3 (±16.51)                            | 999.5                 | 0.621            | 11.2 (±13.09)                 | 22.9 (±19.87)                 | <b>1297.5</b>         | <b>0.002</b>     | 18.9 (±17.56)                                   | 19.0 (±20.28)                               | 983                   | 0.847        |
| Since COVID-19 pandemic, self-perceived change in... |                                       |                                          |                       |                  |                               |                               |                       |                  |                                                 |                                             |                       |              |
| Eating behaviour                                     | −0.39 (±0.92)                         | −0.07 (±0.78)                            | <b>3852</b>           | <b>0.011</b>     | −0.51 (±0.75)                 | 0.05 (±0.84)                  | <b>4693</b>           | <b>&lt;0.001</b> | −0.11 (±0.69)                                   | −0.30 (±1.03)                               | 3058                  | 0.085        |
| Physical activity                                    | −0.39 (±0.86)                         | −0.37 (±0.89)                            | 3219.5                | 0.922            | −0.47 (±0.94)                 | −0.30 (±0.82)                 | 4005                  | 0.150            | −0.27 (±0.84)                                   | −0.51 (±0.91)                               | 3022                  | 0.082        |
| Smoking behaviour                                    | −0.05 (±0.74)                         | 0.03 (±0.73)                             | 376.5                 | 0.477            | 0.24 (±0.66)                  | −0.08 (±0.75)                 | 264                   | 0.160            | −0.13 (±0.71)                                   | 0.22 (±0.74)                                | <b>465</b>            | <b>0.030</b> |
| Perceived stress                                     | 0.07 (±1.27)                          | 0.58 (±1.17)                             | <b>3923</b>           | <b>0.012</b>     | 0.49 (±1.27)                  | 0.35 (±1.18)                  | 3288.5                | 0.354            | 0.27 (±1.24)                                    | 0.61 (±1.16)                                | 4105                  | 0.066        |
| Sleep quality                                        | −0.67 (±0.76)                         | −0.63 (±0.82)                            | 3258.5                | 0.808            | −0.77 (±0.83)                 | −0.56 (±0.77)                 | 4008                  | 0.139            | −0.68 (±0.82)                                   | −0.60 (±0.77)                               | 3600.5                | 0.821        |

Note. *N* = 171. <sup>a</sup> Mann-Whitney U test. <sup>b</sup> Two diverse participants were excluded from the sub-group analysis of gender (*n* = 169) as a group of 2 cannot be statistically compared. <sup>c</sup> Normal weight: 18.5 kg/m<sup>2</sup> < BMI < 25 kg/m<sup>2</sup>. Overweight: BMI ≥ 25 kg/m<sup>2</sup>. No participants were underweight. <sup>d</sup> Outcome variables: MEDAS as Dietary Quality Score, MET (= metabolic equivalent) for Physical Activity, Pack years for Tobacco Consumption. <sup>e</sup> Differing sample and sub-group sizes due to excluded participants; sex: *n* = 159, *n<sub>m</sub>* = 52, *n<sub>f</sub>* = 107; age: *n<sub>age</sub>* = 161, *n<sub><40</sub>* = 69, *n<sub>≥40</sub>* = 92; weight status: *n<sub>weight</sub>* = 161, *n<sub>N</sub>* = 97, *n<sub>O</sub>* = 64. <sup>f</sup> Differing sample and sub-group sizes as pack years cannot be calculated for non-smokers; sex: *n* = 90, *n<sub>m</sub>* = 33, *n<sub>f</sub>* = 57; age: *n<sub>age</sub>* = 91, *n<sub><40</sub>* = 31, *n<sub>≥40</sub>* = 60; weight status: *n<sub>weight</sub>* = 91, *n<sub>N</sub>* = 53, *n<sub>O</sub>* = 38. *p* < 0.05 for values in bold.

**Table S5.** Sub-group analysis of health behaviours for gender, age and BMI groups.

| Items                                 | <i>n</i> (%)                          | <i>n</i> (%)                             | Chi <sup>2</sup> (df) | <i>p</i> | <i>n</i> (%)                  | <i>n</i> (%)                  | Chi <sup>2</sup> (df) | <i>p</i> | <i>n</i> (%)                                       | <i>n</i> (%)                                | Chi <sup>2</sup> (df) | <i>p</i> |
|---------------------------------------|---------------------------------------|------------------------------------------|-----------------------|----------|-------------------------------|-------------------------------|-----------------------|----------|----------------------------------------------------|---------------------------------------------|-----------------------|----------|
|                                       | Male <sup>a</sup><br>( <i>n</i> = 57) | Female <sup>a</sup><br>( <i>n</i> = 112) |                       |          | <40 years<br>( <i>n</i> = 73) | ≥40 years<br>( <i>n</i> = 98) |                       |          | Normal<br>weight <sup>b</sup><br>( <i>n</i> = 101) | Overweight <sup>b</sup><br>( <i>n</i> = 70) |                       |          |
| <b>Eating behaviour</b>               |                                       |                                          |                       |          |                               |                               |                       |          |                                                    |                                             |                       |          |
| Fruit and vegetables/day              |                                       |                                          | 1.76 (1) <sup>c</sup> | 0.184    |                               |                               | 2.91 (1) <sup>c</sup> | 0.088    |                                                    |                                             | 0.87 (1) <sup>c</sup> | 0.351    |
| <5 pc.                                | 50 (87.7)                             | 89 (79.5)                                |                       |          | 56 (76.7)                     | 85 (86.7)                     |                       |          | 81 (80.2)                                          | 60 (85.7)                                   |                       |          |
| ≥5 pc.                                | 7 (12.3)                              | 23 (20.5)                                |                       |          | 17 (23.3)                     | 13 (13.3)                     |                       |          | 20 (19.8)                                          | 10 (14.3)                                   |                       |          |
| Sweets, cookies/week                  |                                       |                                          | 0.57 (1) <sup>c</sup> | 0.451    |                               |                               | 0.05 (1) <sup>c</sup> | 0.822    |                                                    |                                             | 0.18 (1) <sup>c</sup> | 0.676    |
| <3 portions                           | 24 (42.1)                             | 54 (48.2)                                |                       |          | 33 (45.2)                     | 46 (46.9)                     |                       |          | 48 (47.5)                                          | 31 (44.3)                                   |                       |          |
| ≥3 portions                           | 33 (57.9)                             | 58 (51.8)                                |                       |          | 40 (54.8)                     | 52 (53.1)                     |                       |          | 53 (52.5)                                          | 39 (55.7)                                   |                       |          |
| <b>Drinking behaviour</b>             |                                       |                                          |                       |          |                               |                               |                       |          |                                                    |                                             |                       |          |
| Caffeinated drinks/day                |                                       |                                          | 0.73 (2) <sup>c</sup> | 0.695    |                               |                               | 1.67 (2) <sup>c</sup> | 0.434    |                                                    |                                             | 4.67 (2) <sup>c</sup> | 0.097    |
| No caffeine                           | 11 (19.3)                             | 16 (14.3)                                |                       |          | 14 (19.2)                     | 13 (13.3)                     |                       |          | 21 (20.8)                                          | 6 (8.6)                                     |                       |          |
| <5 cups                               | 20 (35.1)                             | 43 (38.4)                                |                       |          | 24 (32.9)                     | 40 (40.8)                     |                       |          | 36 (35.6)                                          | 28 (40.0)                                   |                       |          |
| ≥5 cups                               | 26 (45.6)                             | 53 (47.3)                                |                       |          | 35 (47.9)                     | 45 (45.9)                     |                       |          | 44 (43.6)                                          | 36 (51.4)                                   |                       |          |
| Work influence on drinking behaviour  |                                       |                                          | 12.19 <sup>d</sup>    | 0.014    |                               |                               | 1.82 (4) <sup>c</sup> | 0.768    |                                                    |                                             | 11.94 <sup>d</sup>    | 0.017    |
| No                                    | 21 (36.8)                             | 23 (20.5)                                |                       |          | 20 (27.4)                     | 24 (24.5)                     |                       |          | 34 (33.7)                                          | 10 (14.3)                                   |                       |          |
| Rarely                                | 11 (19.3)                             | 16 (14.3)                                |                       |          | 14 (19.2)                     | 14 (14.3)                     |                       |          | 17 (16.8)                                          | 11 (15.7)                                   |                       |          |
| Some                                  | 6 (10.5)                              | 33 (29.5)                                |                       |          | 15 (20.5)                     | 25 (25.5)                     |                       |          | 24 (23.8)                                          | 16 (22.9)                                   |                       |          |
| High                                  | 17 (29.8)                             | 30 (26.8)                                |                       |          | 18 (24.7)                     | 29 (29.6)                     |                       |          | 20 (19.8)                                          | 27 (38.6)                                   |                       |          |
| Very high                             | 2 (3.5)                               | 10 (8.9)                                 |                       |          | 6 (8.2)                       | 6 (6.1)                       |                       |          | 6 (5.9)                                            | 6 (8.6)                                     |                       |          |
| <b>Physical activity <sup>e</sup></b> |                                       |                                          |                       |          |                               |                               |                       |          |                                                    |                                             |                       |          |
| Met WHO recommendation                |                                       |                                          | 1.90 <sup>d</sup>     | 0.616    |                               |                               | 1.96 <sup>d</sup>     | 0.621    |                                                    |                                             | 6.15 <sup>d</sup>     | 0.084    |
| Never meet                            | 1 (1.9)                               | 2 (1.9)                                  |                       |          | 0 (0.0)                       | 3 (3.3)                       |                       |          | 0 (0.0)                                            | 3 (4.7)                                     |                       |          |
| 150 min PA total                      | 20 (38.5)                             | 36 (33.6)                                |                       |          | 25 (36.2)                     | 32 (34.8)                     |                       |          | 33 (34.0)                                          | 24 (37.5)                                   |                       |          |
| 150 min PA in recreational time       | 31 (59.6)                             | 69 (64.5)                                |                       |          | 44 (63.8)                     | 57 (62.0)                     |                       |          | 64 (66.0)                                          | 37 (57.8)                                   |                       |          |
| <b>Smoking behaviour</b>              |                                       |                                          |                       |          |                               |                               |                       |          |                                                    |                                             |                       |          |
| Smoking status                        |                                       |                                          | 1.04 (2) <sup>c</sup> | 0.594    |                               |                               | 6.48 (2) <sup>c</sup> | 0.039    |                                                    |                                             | 0.06 (2) <sup>c</sup> | 0.973    |
| Non-smoker                            | 24 (42.1)                             | 55 (49.1)                                |                       |          | 42 (57.5)                     | 38 (38.8)                     |                       |          | 48 (47.5)                                          | 32 (45.7)                                   |                       |          |
| Ex-smoker                             | 12 (21.1)                             | 24 (21.4)                                |                       |          | 14 (19.2)                     | 22 (22.4)                     |                       |          | 21 (20.8)                                          | 15 (21.4)                                   |                       |          |
| Current smoker                        | 21 (36.8)                             | 33 (29.5)                                |                       |          | 17 (23.3)                     | 38 (38.8)                     |                       |          | 32 (31.7)                                          | 23 (32.9)                                   |                       |          |
| <b>Regeneration</b>                   |                                       |                                          |                       |          |                               |                               |                       |          |                                                    |                                             |                       |          |
| Easy to take breaks                   |                                       |                                          | 8.91 (4) <sup>c</sup> | 0.063    |                               |                               | 9.01 (4) <sup>c</sup> | 0.061    |                                                    |                                             | 2.67 (4) <sup>c</sup> | 0.615    |
| Never                                 | 10 (17.5)                             | 14 (12.5)                                |                       |          | 11 (15.1)                     | 13 (13.3)                     |                       |          | 16 (15.8)                                          | 8 (11.4)                                    |                       |          |
| Rarely                                | 17 (29.8)                             | 17 (15.2)                                |                       |          | 21 (28.8)                     | 14 (14.3)                     |                       |          | 17 (16.8)                                          | 18 (25.7)                                   |                       |          |
| Sometimes                             | 15 (26.3)                             | 28 (25.0)                                |                       |          | 20 (27.4)                     | 24 (24.5)                     |                       |          | 28 (27.7)                                          | 16 (22.9)                                   |                       |          |
| Often                                 | 10 (17.5)                             | 37 (33.0)                                |                       |          | 16 (21.9)                     | 31 (31.6)                     |                       |          | 27 (26.7)                                          | 20 (28.6)                                   |                       |          |
| Always                                | 5 (8.8)                               | 16 (14.3)                                |                       |          | 5 (6.8)                       | 16 (16.3)                     |                       |          | 13 (12.9)                                          | 8 (11.4)                                    |                       |          |
| Sleep quality                         |                                       |                                          | 0.94 <sup>d</sup>     | 0.865    |                               |                               | 1.94 <sup>d</sup>     | 0.637    |                                                    |                                             | 2.12 <sup>d</sup>     | 0.591    |

|           |           |           |           |           |           |           |
|-----------|-----------|-----------|-----------|-----------|-----------|-----------|
| Very poor | 1 (1.8)   | 3 (2.7)   | 3 (4.1)   | 1 (1.0)   | 3 (3.0)   | 1 (1.4)   |
| Poor      | 20 (35.1) | 41 (36.6) | 27 (37.0) | 35 (35.7) | 34 (33.7) | 28 (40.0) |
| Good      | 35 (61.4) | 63 (56.3) | 41 (56.2) | 58 (59.2) | 59 (58.4) | 40 (57.1) |
| Very good | 1 (1.8)   | 5 (4.5)   | 2 (2.7)   | 4 (4.1)   | 5 (5.0)   | 1 (1.4)   |

Note.  $N = 171$ . <sup>a</sup> Two diverse participants were excluded from the sub-group analysis of sexes ( $n = 169$ ) as a group of 2 cannot be statistically compared. <sup>b</sup> Normal weight:  $18.5 \text{ kg/m}^2 < \text{BMI} < 25 \text{ kg/m}^2$ . Overweight:  $\text{BMI} \geq 25 \text{ kg/m}^2$ . No participants were underweight. <sup>c</sup> Chi-square test. <sup>d</sup> Fisher's Exact test. <sup>e</sup> Differing sample and sub-group sizes due to excluded participants; sex:  $n = 159$ ,  $n_m = 52$ ,  $n_f = 107$ ; age:  $n_{\text{age}} = 161$ ,  $n_{<40} = 69$ ,  $n_{\geq 40} = 92$ ; weight status:  $n_{\text{weight}} = 161$ ,  $n_N = 97$ ,  $n_O = 64$ .  $p < 0.05$  for values indicated in bold.
